# Supplementary material for: Highly sensitive humidity-driven actuators based on metal–organic frameworks incorporating thermoplastic polyurethane with gradient polymer distribution
Source: Royal Society of Chemistry journal article supplement (doi:10.1039/d1ra08174h), 2021-01-01
Supplement: d1ra08174h1.pdf [file d1ra08174h1.pdf]

# SUPPORTING INFORMATION

## Highly sensitive humidity-driven actuators based on metal-organic frameworks in mixed matrix films

Yi He,<sup>a</sup> Jiayu Guo,<sup>\*a</sup> Xiazhen Yang,<sup>b</sup> Bing Guo<sup>a</sup> and Hangyan  
Shen<sup>a</sup>

- a. College of Materials and Chemistry, China Jiliang University,  
Hangzhou 310018, PR China.
- b. The Institute of Industrial Catalysis, Zhejiang University of  
Technology, Hangzhou 310032, PR China.

\*Corresponding author: [guojiayu2000@hotmail.com](mailto:guojiayu2000@hotmail.com) (J. Guo);  
[08b0506047@cjlu.edu.cn](mailto:08b0506047@cjlu.edu.cn) (B. Guo).

## **Tables and Figures**

**Table S1.** The equilibrium relative humidity of the selected saturated salt solution

| Temperature (°C) | MgCl <sub>2</sub> | K <sub>2</sub> CO <sub>3</sub> | NaBr       | NaCl       | KCl        |
|------------------|-------------------|--------------------------------|------------|------------|------------|
| 15               | 33.30±0.21        | 43.15±0.33                     | 60.68+0.51 | 75.61±0.18 | 85.92+0.33 |
| 20               | 33.07±0.18        | 43.16±0.33                     | 59.14+0.44 | 75.47±0.14 | 85.11+0.29 |
| 25               | 32.78±0.16        | 43.16±0.39                     | 57.57+0.40 | 75.29±0.13 | 84.34+0.26 |
| 30               | 32.44±0.14        | 43.17±0.50                     | 56.03+0.38 | 75.09±0.11 | 83.62+0.25 |
| 35               | 32.05±0.13        | /                              | 54.55+0.38 | 74.87±0.12 | 82.95+0.25 |

**Table S2.** Nitrogen physical adsorption analysis of bare MIL-88A and MIL-88A@TPU films with different MIL-88A loadings.

| Samples   | MOF loading (wt.%) | Pore size (nm) | BET surface area (m <sup>2</sup> /g) | Pore volume (cm <sup>3</sup> /g) |
|-----------|--------------------|----------------|--------------------------------------|----------------------------------|
| MIL-88A   | 100                | 2.2383         | 281.5826                             | 0.064356                         |
| 90MOF@TPU | 90                 | 8.0425         | 20.6899                              | 0.037857                         |
| 80MOF@TPU | 80                 | 10.8079        | 9.5886                               | 0.022911                         |
| 70MOF@TPU | 70                 | 7.5782         | 32.8715                              | 0.055694                         |
| 60MOF@TPU | 60                 | 7.9057         | 18.1818                              | 0.032026                         |
| TPU       | 0                  | 3.8887         | 7.8322                               | 0.007614                         |

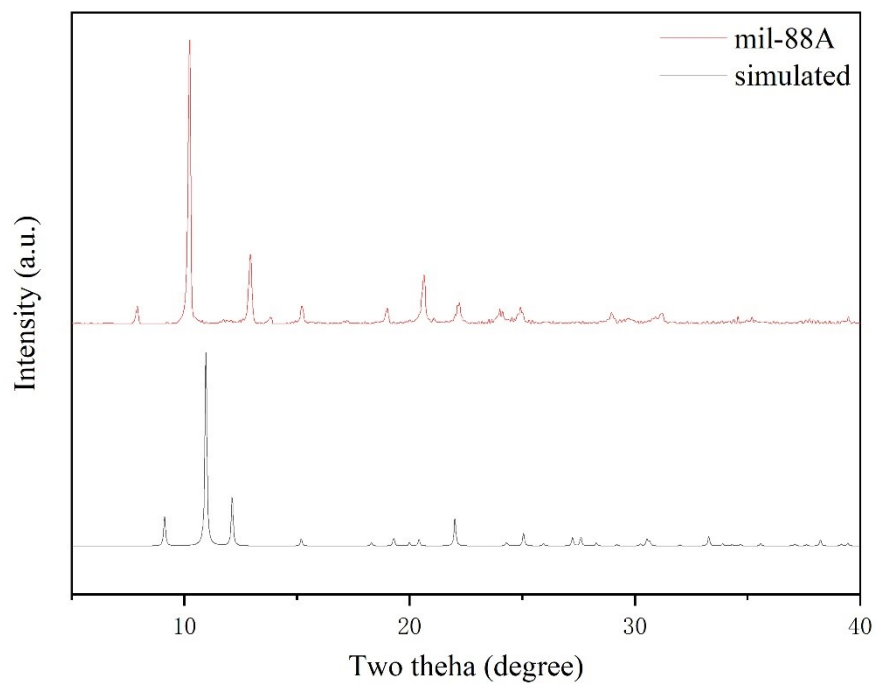

**Figure S1.** PXRD of as-synthesized MIL-88A(Fe) used in this study with the calculated powder pattern for comparison.

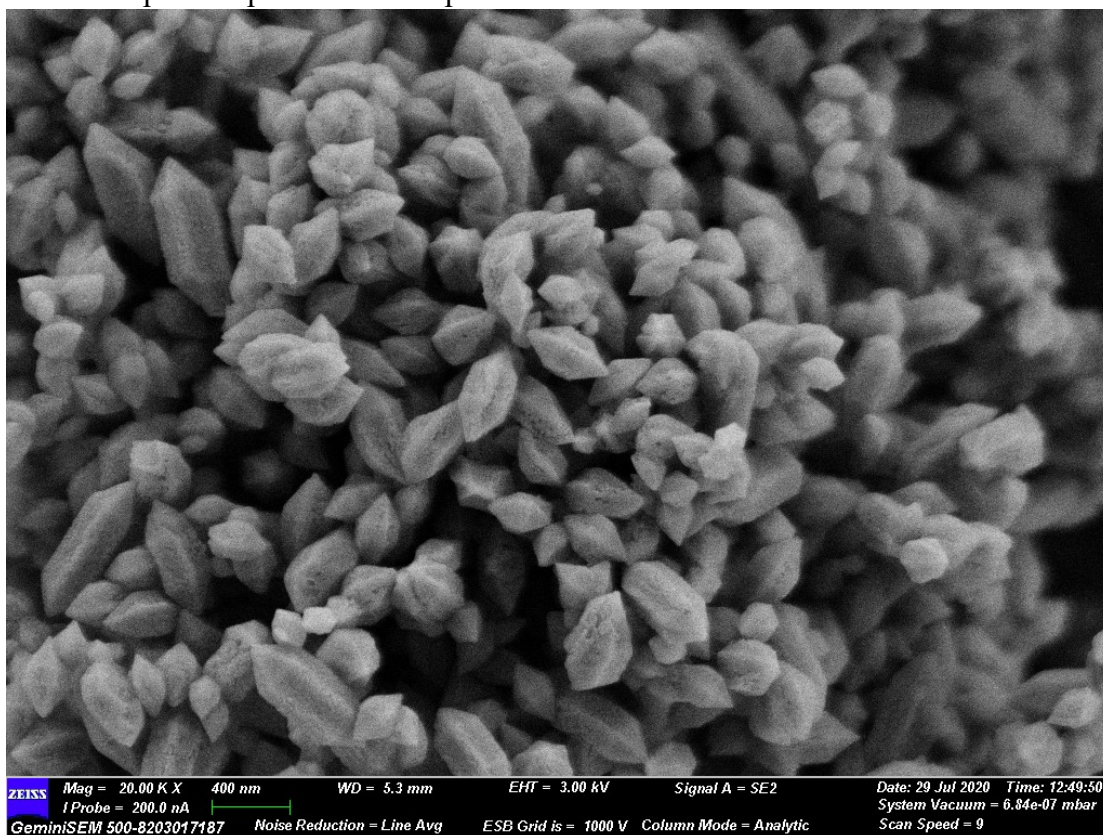

**Figure S2.** SEM image of the MIL-88A(Fe) used in this study.

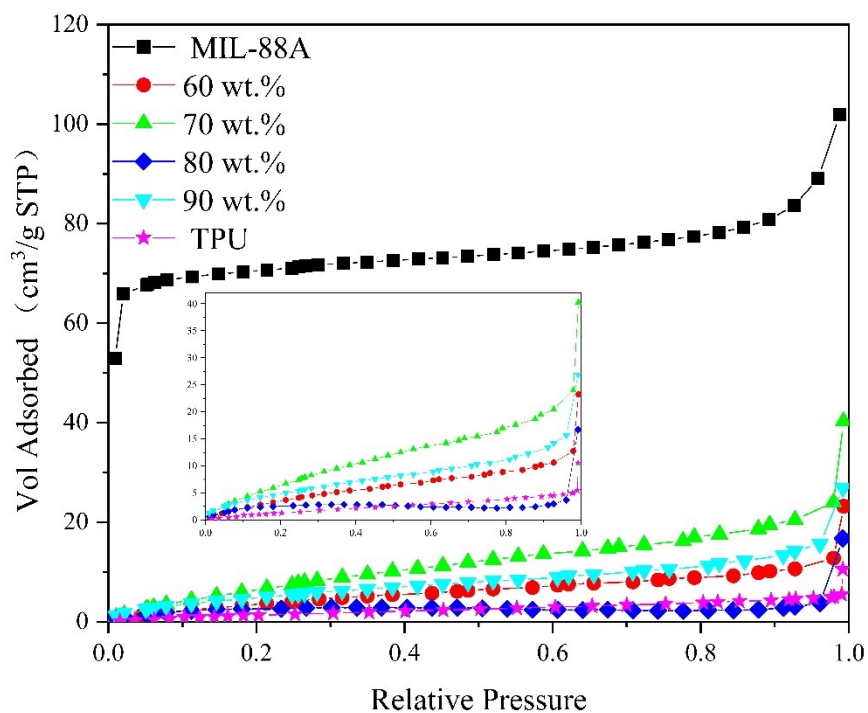

**Figure S3.** Nitrogen physisorption isotherms at 77 k of bare MIL-88A and MIL-88A@TPU films with different MIL-88A loadings.

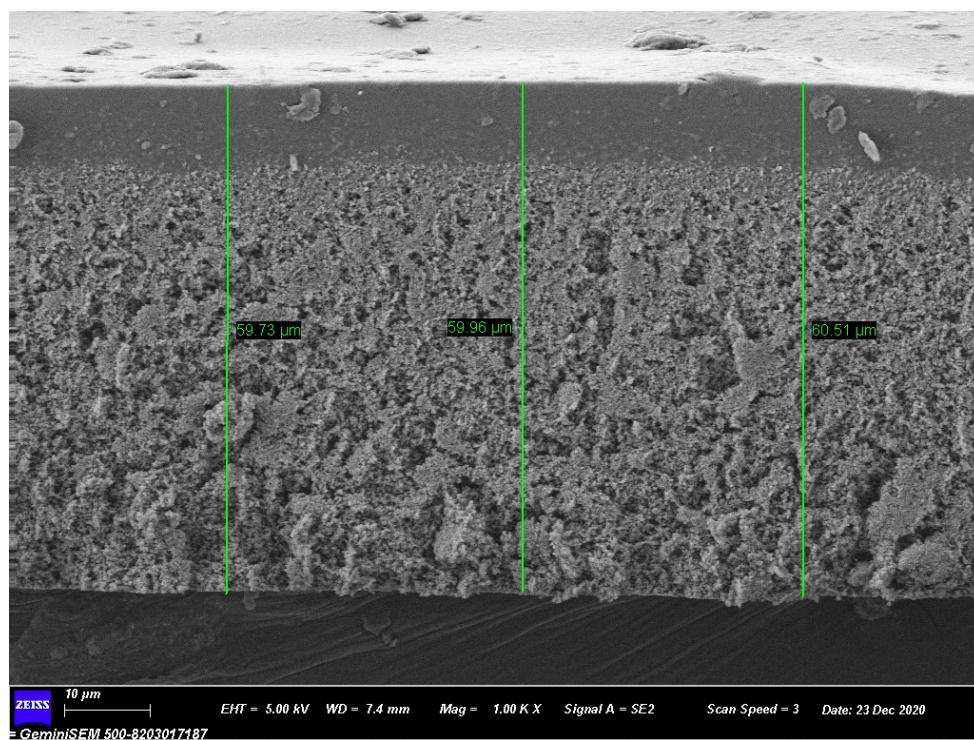

**Figure S4.** SEM cross-sectional image of MIL-88A@TPU films with 60 wt.% MIL-88A loadings.
